# Supplementary material for: Large-format additive manufacturing of polymer extrusion-based deposition systems: review and applications
Source: Springer Nature journal article supplement (doi:10.1007/s40964-023-00397-9), 2023-01-17
Supplement: MOESM1 [file 23931532]

**Annex I**

**List of LFAM Printers with building volumes higher than 1 m3**

|  | **Brand** | **Model** | ***x* (m)** | ***y* (m)** | ***z* (m)** | **Volume (m3)** | **Technology** | **Release**  **Date** | **Price ($)** | **Link** |
| --- | --- | --- | --- | --- | --- | --- | --- | --- | --- | --- |
| **1** | **CreatBot** | F1000 | *1.00* | 1.00 | 1.00 | 1.00 | FFF | 2019 | 29 999 | <https://www.aniwaa.com/product/3d-printers/creatbot-f1000/> |
| **2** | **Modix** | BIG-Meter | 1,01 | 1,01 | 1,01 | 1,0 | FFF | 2020 | 11 500 | <https://www.aniwaa.com/product/3d-printers/modix-big-meter/> |
| **3** | **IEMAI 3D** | YM-NT-1000 | 1,00 | 1,00 | 1,00 | 1,0 | FFF | 2021 | 25 000 | <https://www.aniwaa.com/product/3d-printers/iemai-3d-ym-nt-1000/> |
| **4** | **BigRep** | BigRep ONE V4 | 1,01 | 1,01 | 1,01 | 1,0 | FFF | 2021 | 30 000 | <https://www.aniwaa.com/product/3d-printers/bigrep-one/> |
| **5** | **Builder** | Builder Extreme 3000 | 1,10 | 1,10 | 0,82 | 1,0 | FFF | 2021 | 35 000 | <https://www.aniwaa.com/product/3d-printers/builder-builder-extreme-3000-pro/> |
| **6** | **CDFI 3D** | CDFI 1m3 | 1,00 | 1,00 | 1,00 | 1,0 | FFF | 2021 | 38 000 | <https://www.aniwaa.com/product/3d-printers/cdfi-3d-cdfi-1m3/> |
| **7** | **Total Z** | Anyform 1000-LPRO | 1,01 | 1,01 | 1,01 | 1,0 | FFF | 2021 | 57 000 | <https://www.aniwaa.com/product/3d-printers/total-z-anyform-1000-lpro/> |
| **8** | **Orbital Composites** | Orbital S ***** | 1,00 | 1,00 | 1,00 | 1,0 | FFF | 2021 | n.a. | <https://www.aniwaa.com/product/3d-printers/orbital-composites-orbital-s/> |
| **9** | **3ntr** | Sequoia | 1,00 | 1,00 | 1,00 | 1,0 | FFF | 2022 | n.a. | <https://www.aniwaa.com/product/3d-printers/3ntr-sequoia/> |
| **10** | **MagnaRecta** | Arki | 1,00 | 1,00 | 1,00 | 1,0 | FFF/Pellets | 2021 | n.a. | <https://www.aniwaa.com/product/3d-printers/magnarecta-arki/> |
| **11** | **Roboze** | ARGO 1000 ***** | 1,00 | 1,00 | 1,00 | 1,0 | FFF | 2022 | 450 000 | <https://www.aniwaa.com/product/3d-printers/roboze-argo-1000/> |
| **12** | **3D Platform** | 400 Series  Workbench xtreme | 1,00 | 1,50 | 0.70 | 1.1 | FFF | 2017 | 49 999 | <https://www.aniwaa.com/product/3d-printers/3d-platform-400-series-workbench-xtreme/> |
| **13** | **ATMAT** | Saturn | 1,20 | 1,00 | 1,00 | 1,2 | FFF | 2018 | 49 000 | <https://www.aniwaa.com/product/3d-printers/atmat-saturn/> |
| **14** | **WASP** | DeltaWASP 3MT | 1,00 | 1,00 | 1,20 | 1,2 | Pellets | 2019 | 53 000 | <https://www.aniwaa.com/product/3d-printers/wasp-deltawasp-3mt-industrial-4-0/> |
| **15** | **Titan Robotics** | Atlas 2.5 | 1,07 | 1,07 | 1,22 | 1,4 | Pellets | 2016 | n.a. | <https://www.aniwaa.com/product/3d-printers/titan-robotics-atlas-2-5/> |
| **16** | **Q.big 3D** | QUEEN | 1,50 | 1,00 | 1,00 | 1,5 | FFF | 2021 | 80 000 | <https://www.aniwaa.com/product/3d-printers/q-big-3d-queen/> |
| **17** | **Tractus 3D** | T3500 | 0.885 | 0.885 | 2.10 | 1.65 | FFF | 2017 | 59 000 | <https://www.aniwaa.com/product/3d-printers/tractus3d-t3500-rtp/> |
| **18** | **ATMAT** | Jupiter | 2,00 | 1,00 | 1,00 | 2,0 | FFF | 2018 | n.a. | <https://www.aniwaa.com/product/3d-printers/atmat-jupiter/> |
| **19** | **The Industry** | MAGNUM | 1,50 | 1,20 | 1,20 | 2,2 | Pellets | 2022 | 135 000 | <https://www.aniwaa.com/product/3d-printers/the-industry-magnum/> |
| **20** | **Colossus** | XS | 1,60 | 1,20 | 1,30 | 2,5 | Pellets | 2021 | n.a. | <https://www.aniwaa.com/product/3d-printers/colossus-xs/> |
| **21** | **Titan Robotics** | Atlas 3.6 | 1.27 | 1.27 | 1.83 | 3 | Pellets | 2020 | n.a. | <https://www.aniwaa.com/product/3d-printers/titan-robotics-atlas-3-6/> |
| **22** | **CNC Barcenas** | Super Discovery | 1,30 | 2,50 | 1,00 | 3,3 | Pellets | 2019 | n.a. | <https://www.aniwaa.com/product/3d-printers/cnc-barcenas-super-discovery/> |
| **23** | **BLB Industries** | THE BOX Large | 2.00 | 2.00 | 1.50 | 6 | Pellets | 2019 | 298 000 | <https://www.aniwaa.com/product/3d-printers/blb-industries-the-box-large/> |
| **24** | **CEAD** | CFAM Prime * | 2.00 | 1.50 | 4.00 | 12 | Pellets | 2018 | n.a. | <https://www.aniwaa.com/product/3d-printers/cead-cfam-3d-printer/> |
| **25** | **REV3RD** | RD-HUGE | 2,50 | 2,70 | 2,10 | 14,2 | Pellets | 2021 | 220 000 | <https://www.aniwaa.com/product/3d-printers/rev3rd-rd-huge/> |
| **26** | **Millebot** | MILLE-500XL | 1.60 | 1.60 | 6.00 | 15.4 | Pellets | 2017 | n.a. | <https://www.aniwaa.com/product/3d-printers/millebot-mille-500xl/> |
| **27** | **Cincinnati Incorporated** | BAAM | 2.30 | 6.10 | 1.83 | 25.7 | Pellets | 2018 | n.a. | <https://www.aniwaa.com/product/3d-printers/cincinnati-incorporated-baam/> |
| **28** | **Ingersoll** | Masterprint | 6,00 | 4,00 | 2,00 | 48,0 | Pellets | 2018 | n.a. | <https://www.aniwaa.com/product/3d-printers/ingersoll-masterprint/> |
| **29** | **Breton** | Genesi | 2,00 | 3,20 | 8,40 | 53,8 | Pellets | 2021 | n.a. | <https://www.aniwaa.com/product/3d-printers/breton-genesi/> |
| **30** | **Thermwood** | LSAM 1540 | 12.19 | 4.57 | 1.52 | 84.68 | Pellets | 2021 | 400 000 | <https://www.aniwaa.com/product/3d-printers/thermwood-lsam-1540/> |

*** High performance polymers (PEEK; ULTEM, etc.) and composites**

**n. a. – Not Available**
